# Supplementary material for: Growth inhibition of pathogenic microorganisms by Pseudomonas protegens EMM-1 and partial characterization of inhibitory substances
Source: PLOS journal article supplement (doi:10.1371/journal.pone.0240545), 2020-10-15
Supplement: S1 (10.1371/journal.pone.0240545.s001) [file journal.pone.0240545.s001]

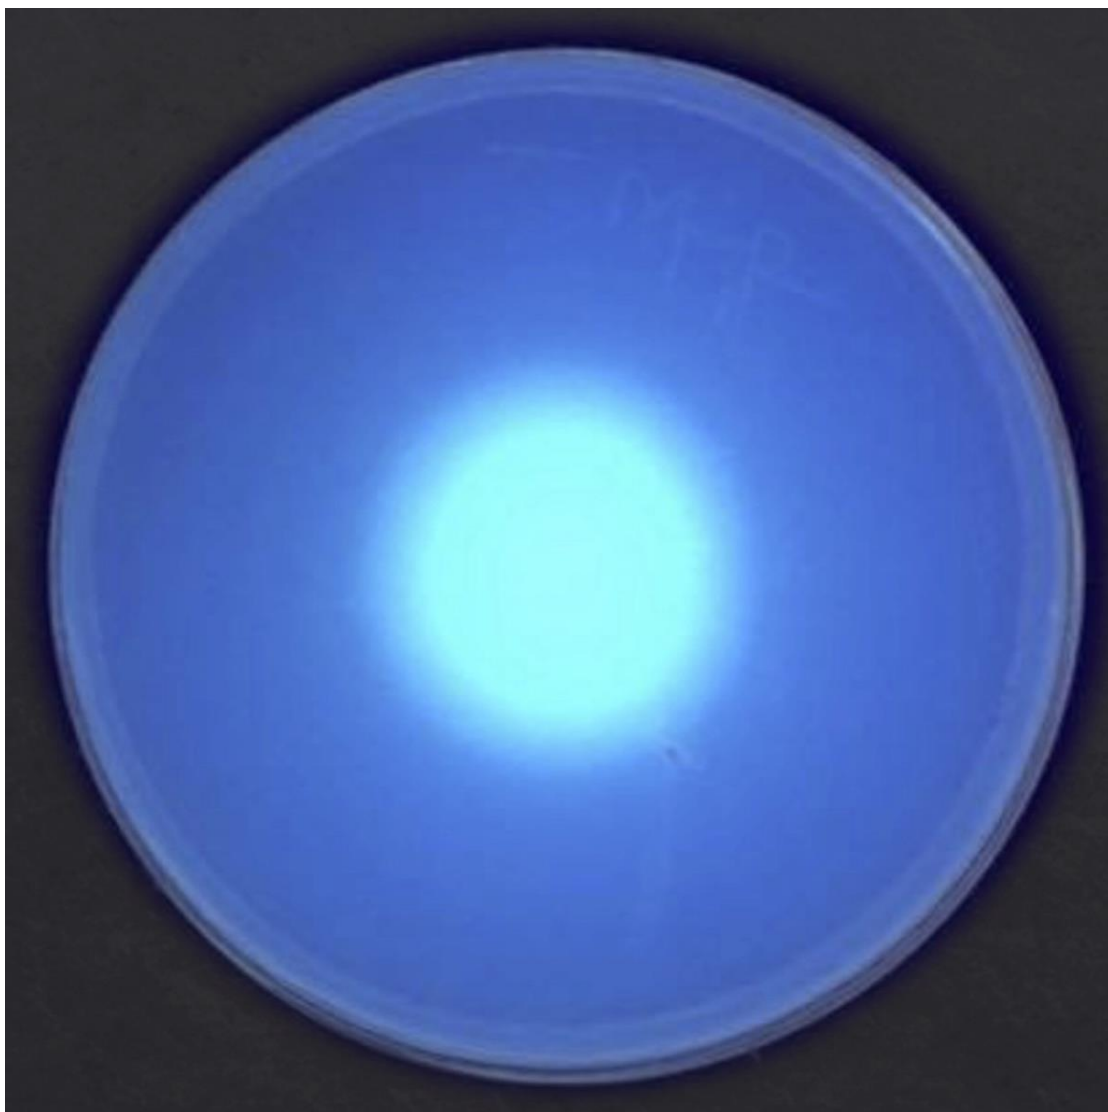

**S1 Fig. Fluorescence observed under UV light.** *P. protegens* EMM-1 was growth in *Pseudomonas* isolation agar which enhance the formation of blue or blue-green pyocyanin pigments by *Pseudomonas* species.
